# Supplementary material
Source: PubMed Central journal article supplement (PMC5697761)
Supplement: NIHMS827613-supplement-3.pdf [file NIHMS827613-supplement-3.pdf]

## Supplementary Material

Table S1 Details of odors used in the screen for LmigOR3.

| Odor name                     | CAS No.    | Solvent      | Purity |
|-------------------------------|------------|--------------|--------|
| (-)-carveol                   | 99-48-9    | paraffin oil | 98%    |
| (±)-2-butanol                 | 15982-73-6 | paraffin oil | 99.5%  |
| (±)-2-heptanol                | 543-49-7   | paraffin oil | 98%    |
| (±)-3-heptanol                | 589-82-2   | paraffin oil | 99%    |
| (±)-menthol                   | 15356-76-4 | paraffin oil | 99%    |
| (+)-borneol                   | 464-43-7   | paraffin oil | 98%    |
| (+)-limonene oxide            | 2206-27-1  | paraffin oil | 99.9%  |
| (1R)-(+)-alpha-pinene         | 7785-70-8  | paraffin oil | 99%    |
| (1R)-(+)-camphor              | 464-93-3   | paraffin oil | 99%    |
| (R)-(-)-carvone               | 6485-40-1  | paraffin oil | 98%    |
| R-(+)-citronellal             | 2385-77-5  | paraffin oil | 90%    |
| (R)-(+)-limonene              | 5989-27-5  | paraffin oil | 97%    |
| 1,1-dimethoxyethane           | 534-15-6   | paraffin oil | 95%    |
| 1,3-propanedithiol            | 109-80-8   | paraffin oil | 99%    |
| 1,4-diaminobutane             | 110-60-1   | paraffin oil | 99%    |
| 1-butanol                     | 71-36-3    | paraffin oil | 99.8%  |
| 1-nonanol                     | 143-08-8   | paraffin oil | 98%    |
| 1-octanol                     | 111-87-5   | paraffin oil | 99%    |
| 1-octen-3-ol                  | 3391-86-4  | paraffin oil | 98%    |
| 1-pentanol                    | 71-41-0    | paraffin oil | 99%    |
| 1-propanol                    | 71-23-8    | paraffin oil | 99.5%  |
| 2,3-butanedione (diacetyl)    | 431-03-8   | paraffin oil | 97%    |
| 2,3-dimethylpyrazine          | 5910-84-4  | paraffin oil | 99%    |
| 2,4,5-trimethyl thiazole      | 13623-11-3 | paraffin oil | 98%    |
| 2,5-dimethylpyrazine          | 123-32-0   | paraffin oil | 98%    |
| 2,6-dimethylpyrazine          | 108-50-9   | paraffin oil | 98%    |
| 2-acetylfuran                 | 1192-62-7  | paraffin oil | 99%    |
| 2-acetylthiazole              | 24295-03-3 | paraffin oil | 99%    |
| 2-butanol                     | 78-92-2    | paraffin oil | 99.5%  |
| 2-butanone                    | 78-93-3    | paraffin oil | 99%    |
| 2-decanone                    | 693-54-9   | paraffin oil | 98%    |
| 2-furaldehyde                 | 98-01-1    | paraffin oil | 99%    |
| 2-heptanone                   | 110-43-0   | paraffin oil | 98%    |
| 2-hexanol                     | 626-93-7   | paraffin oil | 99%    |
| 2-hexanone                    | 591-78-6   | paraffin oil | 99%    |
| 2-isobutyl-3-methoxy-pyrazine | 24683-00-9 | paraffin oil | 99%    |
| 2-isobutylthiazole            | 18140-74-9 | paraffin oil | 99%    |
| 2-methoxy-3-methyl-pyrazine   | 2847-30-5  | paraffin oil | 99%    |
| 2-methoxypyrazine             | 3149-28-8  | paraffin oil | 95%    |
| 2-methyl-1-propanol           | 78-83-1    | paraffin oil | 99.5%  |

|                                   |            |              |       |
|-----------------------------------|------------|--------------|-------|
| 2-methylcyclohexanol              | 583-59-5   | paraffin oil | 99%   |
| 2-methylpyrazine                  | 109-08-0   | paraffin oil | 99.5% |
| 2-methylquinoxaline               | 7251-61-8  | paraffin oil | 97%   |
| 2-octanol                         | 123-96-6   | paraffin oil | 97%   |
| 2-octanone                        | 111-13-7   | paraffin oil | 98%   |
| 2-octenoic acid                   | 1871-67-6  | paraffin oil | 85%   |
| 2-pentanol                        | 6032-29-7  | paraffin oil | 98%   |
| 2-pentanone                       | 107-87-9   | paraffin oil | 97%   |
| 2-propanol                        | 67-63-0    | paraffin oil | 99.5% |
| 3-(methylthio)-1-propanol         | 105-10-2   | paraffin oil | 98%   |
| 3-heptanone                       | 106-35-4   | paraffin oil | 98%   |
| 3-hexanol                         | 623-37-0   | paraffin oil | 97%   |
| 3-hydroxy-2-butanone              | 513-86-0   | paraffin oil | 96%   |
| 3-methyl-1-butanol                | 123-51-3   | paraffin oil | 99%   |
| 3-methylindole                    | 83-34-1    | paraffin oil | 98%   |
| 3-nonanone                        | 925-78-0   | paraffin oil | 99%   |
| 3-octanol                         | 20296-29-1 | paraffin oil | 99%   |
| 3-octanone                        | 106-68-3   | paraffin oil | 98%   |
| 3-pentanone                       | 96-22-0    | paraffin oil | 99%   |
| 4,5-dimethylthiazole              | 3581-91-7  | paraffin oil | 97%   |
| 4-allyl-1,2-dimethoxy-benzene     | 97-15-2    | paraffin oil | 99%   |
| 4-isopropylbenzaldehyde           | 122-03-2   | paraffin oil | 98%   |
| 4-methylcyclohexanol              | 589-91-3   | paraffin oil | 99%   |
| 4-methylthiazole                  | 693-95-8   | paraffin oil | 99%   |
| 4-methylvaleric acid              | 646-07-1   | paraffin oil | 99%   |
| 4-penten-1-ol                     | 821-09-0   | paraffin oil | 99%   |
| 5-methylquinoxaline               | 13708-12-8 | paraffin oil | 98%   |
| 6-heptenoic acid                  | 1119-60-4  | paraffin oil | 99%   |
| 7-oxabicyclo[2.2.1]-heptane       | 279-49-2   | paraffin oil | 98%   |
| acetic acid                       | 64-19-7    | paraffin oil | 99%   |
| acetone                           | 67-64-1    | paraffin oil | 99.9% |
| acetophenone                      | 98-86-2    | paraffin oil | 99%   |
| acetyl pyrazine                   | 22047-25-2 | paraffin oil | 97%   |
| alpha-lonone                      | 127-41-3   | paraffin oil | 90%   |
| alpha-terpineol                   | 98-55-5    | paraffin oil | 99%   |
| ammonia                           | 7664-41-7  | paraffin oil | 99%   |
| benzaldehyde                      | 100-52-7   | paraffin oil | 99%   |
| benzoic acid                      | 65-85-0    | paraffin oil | 99.5% |
| benzyl alcohol                    | 100-51-6   | paraffin oil | 99%   |
| benzylamine                       | 100-46-9   | paraffin oil | 99%   |
| benzyl benzoate                   | 120-51-4   | paraffin oil | 99%   |
| benzyl trans-2-methyl-2-butenoate | 37526-88-8 | paraffin oil | 90%   |
| beta-citronellol                  | 106-22-9   | paraffin oil | 95%   |

|                        |            |              |       |
|------------------------|------------|--------------|-------|
| butyl acetate          | 123-86-4   | paraffin oil | 99.7% |
| butylamine             | 109-73-9   | paraffin oil | 99%   |
| butyl butyrate         | 109-21-7   | paraffin oil | 98%   |
| butyraldehyde          | 123-72-8   | paraffin oil | 99%   |
| butyric acid           | 107-92-6   | paraffin oil | 99%   |
| camphene               | 79-92-5    | paraffin oil | 95%   |
| caryophyllene oxide    | 1139-30-6  | paraffin oil | 99%   |
| chlorobenzene          | 108-90-7   | paraffin oil | 99%   |
| cineole                | 470-82-6   | paraffin oil | 99%   |
| cis-2-hexen-1-ol       | 928-94-9   | paraffin oil | 95%   |
| cis-9-tricosene        | 27519-02-4 | paraffin oil | 97%   |
| citral                 | 5392-40-5  | paraffin oil | 95%   |
| citronellyl acetate    | 150-84-5   | paraffin oil | 97%   |
| cyclohexanone          | 108-94-1   | paraffin oil | 99.8% |
| decanoic acid          | 334-48-5   | paraffin oil | 98%   |
| decyl aldehyde         | 112-31-295 | paraffin oil | 95%   |
| dimethoxymethane       | 109-87-5   | paraffin oil | 99.5% |
| docosane               | 629-97-0   | paraffin oil | 99.5% |
| dodecyl aldehyde       | 112-31-295 | paraffin oil | 92%   |
| ethanolamine           | 141-43-5   | paraffin oil | 99.5% |
| ethyl 2-methylbutyrate | 7452-79-1  | paraffin oil | 99%   |
| ethyl acetate          | 141-78-6   | paraffin oil | 99.8% |
| ethyl alcohol          | 925-93-9   | paraffin oil | 99%   |
| ethyl butyrate         | 105-54-4   | paraffin oil | 99%   |
| ethyl formate          | 109-94-4   | paraffin oil | 97%   |
| ethyl isobutyrate      | 97-62-1    | paraffin oil | 99%   |
| ethyl propionate       | 105-37-3   | paraffin oil | 99%   |
| ethyl pyrazine         | 13925-00-3 | paraffin oil | 98%   |
| eugenol                | 97-53-0    | paraffin oil | 99%   |
| farnesol               | 4602-84-0  | paraffin oil | 95%   |
| formic acid            | 64-18-6    | paraffin oil | 88%   |
| furfuryl heptanoate    | 39481-28-2 | paraffin oil | 98%   |
| furfuryl octanoate     | 39252-03-4 | paraffin oil | 98%   |
| gamma-valerolactone    | 108-29-2   | paraffin oil | 99%   |
| geraniol               | 106-24-1   | paraffin oil | 98%   |
| geranyl acetate        | 105-87-3   | paraffin oil | 98%   |
| geranyl acetone        | 689-67-8   | paraffin oil | 97%   |
| heneicosane            | 629-94-7   | paraffin oil | 98%   |
| heptaldehyde           | 111-71-7   | paraffin oil | 95%   |
| hexanal                | 66-25-1    | paraffin oil | 98%   |
| hexane                 | 71-23-8    | paraffin oil | 99.5% |
| hexanoic acid          | 142-72-8   | paraffin oil | 99%   |
| hexyl acetate          | 142-92-7   | paraffin oil | 99%   |

|                     |           |              |        |
|---------------------|-----------|--------------|--------|
| hexyl alcohol       | 111-27-3  | paraffin oil | 99%    |
| hexylamine          | 111-36-2  | paraffin oil | 99%    |
| indole              | 120-72-9  | paraffin oil | 99%    |
| isoamyl acetate     | 123-92-2  | paraffin oil | 99%    |
| isoamyl alcohol     | 12-51-3   | paraffin oil | 98%    |
| isovaleric acid     | 503-74-2  | paraffin oil | 99%    |
| L-bornyl acetate    | 5655-61-8 | paraffin oil | 95%    |
| linalool            | 78-70-6   | paraffin oil | 97%    |
| linalyl acetate     | 115-95-7  | paraffin oil | 97%    |
| methyl acetate      | 79-20-9   | paraffin oil | 99.5%  |
| methyl alcohol      | 67-56-1   | paraffin oil | 99.93% |
| methyl anthranilate | 134-20-3  | paraffin oil | 99%    |
| methyl isobutyrate  | 547-63-7  | paraffin oil | 99%    |
| methyl laurate      | 111-82-0  | paraffin oil | 99.55% |
| methyl palmitate    | 112-39-0  | paraffin oil | 99%    |
| methyl salicylate   | 119-96-8  | paraffin oil | 99%    |
| methyl sulfoxide    | 2206-27-1 | paraffin oil | 99.9%  |
| myrcene             | 123-35-5  | paraffin oil | 90%    |
| nerol               | 106-25-2  | paraffin oil | 97%    |
| nonanoic acid       | 112-05-0  | paraffin oil | 96%    |
| nonyl acetate       | 124-19-6  | paraffin oil | 95%    |
| o-eugenol           | 579-60-2  | paraffin oil | 98%    |
| octanoic acid       | 124-07-2  | paraffin oil | 99.5%  |
| octyl acetate       | 112-14-1  | paraffin oil | 99%    |
| octyl aldehyde      | 124-13-0  | paraffin oil | 99%    |
| p-cresol            | 106-44-5  | paraffin oil | 99%    |
| p-cymene            | 99-87-6   | paraffin oil | 99%    |
| p-tolualdehyde      | 104-87-0  | paraffin oil | 97%    |
| p-xylene            | 106-42-3  | paraffin oil | 99%    |
| pentacosane         | 629-99-2  | paraffin oil | 99.5%  |
| pentane             | 109-66-0  | paraffin oil | 99%    |
| phenylacetaldehyde  | 122-78-1  | paraffin oil | 90%    |
| pentyl acetate      | 628-63-7  | paraffin oil | 98%    |
| pentyl propionate   | 674-54-4  | paraffin oil | 99%    |
| pentyl valerate     | 2173-56-0 | paraffin oil | 97%    |
| phenethyl alcohol   | 60-12-8   | paraffin oil | 99%    |
| propionic acid      | 79-09-4   | paraffin oil | 99.5%  |
| propyl acetate      | 109-60-4  | paraffin oil | 99%    |
| propyl disulfide    | 629-19-6  | paraffin oil | 99%    |
| propyl propionate   | 106-93-7  | paraffin oil | 99%    |
| propyl valerate     | 141-06-0  | paraffin oil | 99.7%  |
| pyrazine            | 2847-30-5 | paraffin oil | 99%    |
| pyrrolidine         | 123-75-1  | paraffin oil | 99%    |

|                         |           |              |       |
|-------------------------|-----------|--------------|-------|
| salicylaldehyde         | 90-02-8   | paraffin oil | 98%   |
| tetracosane             | 646-41-1  | paraffin oil | 99.5% |
| thiazole                | 288-47-1  | paraffin oil | 99%   |
| thymol                  | 89-83-8   | paraffin oil | 98%   |
| toluene                 | 108-88-3  | paraffin oil | 99.8% |
| trans-2-hexen-1-ol      | 928-95-0  | paraffin oil | 96%   |
| trans-2-hexenal         | 6718-26-3 | paraffin oil | 98%   |
| trans-2-hexenyl acetate | 2497-18-9 | paraffin oil | 98%   |
| trans-2-octenal         | 2548-87-0 | paraffin oil | 94%   |
| trans-anethole          | 4180-23-8 | paraffin oil | 99%   |
| tricosane               | 639-67-5  | paraffin oil | 99%   |
| vanillin                | 121-33-5  | paraffin oil | 99%   |
| valencene               | 4630-07-3 | paraffin oil | 70%   |
| valeraldehyde           | 110-62-3  | paraffin oil | 97%   |
| valeric acid            | 109-52-4  | paraffin oil | 99%   |
| xylenes                 | 1330-20-7 | paraffin oil | 98.5% |

Table S2 Odor response of aT1 sensilla expressed LmigOR3 to chemicals.

| Classification                  | Odor name/Carbon number   | Response( $\Delta$ spikes/s) |
|---------------------------------|---------------------------|------------------------------|
| ketones                         | 2-heptanone/7             | 30.38 $\pm$ 5.03             |
|                                 | 3-heptanone/7             | 28.7 $\pm$ 5.22              |
|                                 | 3-octanone/8              | 59.32 $\pm$ 7.06             |
|                                 | 2-octanone /8             | 39.33 $\pm$ 7.44             |
|                                 | 3-nonanone/9              | 45.22 $\pm$ 6.97             |
|                                 | 2-decanone/10             | 14.8 $\pm$ 2.63              |
| esters                          | ethyl propionate/5        | 8.07 $\pm$ 2.84              |
|                                 | ethyl isobutyrate/6       | 9.83 $\pm$ 3.90              |
|                                 | propyl propionate/6       | 11.88 $\pm$ 5.09             |
|                                 | butyl acetate/6           | 19.27 $\pm$ 7.07             |
|                                 | ethyl butyrate/6          | 20.3 $\pm$ 4.00              |
|                                 | ethyl 2-methylbutyrate/7  | 15.6 $\pm$ 2.84              |
|                                 | pentyl acetate/7          | 25.23 $\pm$ 6.42             |
|                                 | trans-2-hexenyl acetate/7 | 43.03 $\pm$ 5.80             |
|                                 | propyl valerate/8         | 14.9 $\pm$ 4.36              |
|                                 | butyl butyrate/8          | 39.93 $\pm$ 6.73             |
|                                 | hexyl acetate/8           | 43.4 $\pm$ 9.12              |
|                                 | pentyl propionate/8       | 49.43 $\pm$ 5.70             |
|                                 | heterocycles              | 4,5-dimethylthiazole/5       |
| 2,3-dimethylpyrazine/6          |                           | 9.68 $\pm$ 4.65              |
| 2-methoxy-3-methyl-pyrazine/6   |                           | 15.13 $\pm$ 4.44             |
| 2,5-dimethylpyrazine/6          |                           | 40.25 $\pm$ 11.88            |
| 2,4,5-trimethyl thiazole/6      |                           | 51.35 $\pm$ 9.84             |
| 2-isobutylthiazole/7            |                           | 23.67 $\pm$ 3.51             |
| 2-isobutyl-3-methoxy-pyrazine/9 |                           | 52 $\pm$ 10.43               |
| 2-methylquinoxaline/9           |                           | 10.42 $\pm$ 3.15             |
| alcohols                        | benzyl alcohol/7          | 44.32 $\pm$ 7.54             |

All the chemicals' concentration used in this study is 10% (vol/vol).  $\pm$ SEM, n = 6~7.

Figure S1.

Comparison of response patterns of LmigOR3 expressed in aT1 neurons in transgenic *Drosophila* with that of at3-1B neurons in locusts. Single sensillum recordings were performed and 6 chemicals including 2-heptanone, 2, 5-dimethylpyrazine, octanal, hexanal, trans-2-hexenal, benzaldehyde were selected to compare similarities of response patterns of at3-1B neurons in locusts with that of aT1 neurons in transgenic *Drosophila*. A. Response patterns of at3-1B neurons in locusts. These original data came from Ref. 1 (Cui et al., 2011). For each stimulation, 10  $\mu$ mol each chemical was applied on a zig-zag folded strip of filter paper (1  $\times$  2 cm) inserted into the wide end (0.5 cm i.d.) of a 10-cm-long Pasteur pipette as stimuli source. Similar filter paper strips, with or without 10  $\mu$ l of the solvent, were used as control stimuli. n = 2. Error bars = SEM; B. Response patterns of LmigOR3 expressed in aT1 neurons in transgenic *Drosophila*. All the chemicals' concentration used in this study is 10% (vol/vol). n = 6-7. Error bars = SEM. [1] Cui X, Wu C, Zhang L, 2011. Electrophysiological response patterns of 16 olfactory neurons from the trichoid sensilla to odorant from fecal volatiles in the locust, *Locusta migratoria manilensis*. Arch Insect Biochem Physiol. 77:45-57.
